# Supplementary material for: Harnessing the Rhizosphere of the Halophyte Grass Aeluropus littoralis for Halophilic Plant-Growth-Promoting Fungi and Evaluation of Their Biostimulant Activities
Source: MDPI journal article supplement (doi:10.3390/plants10040784), 2021-04-16
Supplement: s1 [file s1]

**Table S1.** The primers sequences used in the semi quantitative RT-PCR

| <b>Primer</b> | <b>Sequence</b>           |
|---------------|---------------------------|
| YUC6-F        | GGTTTGCTTGGTGCTTCCAT      |
| YUC6-R        | CTTTTCCTCTTTCACCTTGTCGT   |
| Tryp1-F       | GCAGAGGCTTATGTCTATTCAAGG  |
| Tryp1-R       | ATCCAAGTTTCATTGCTGTAAAAAG |
| DET2-F        | TTTGGTTCCTAGAGCTTGTGC     |
| DET2-R        | TCAAGGTAAAGCCAAATACAGTCC  |
| DWF4-F        | GCCTTTTGCCTTCCCTTACG      |
| DWF4-R        | CTGAGGTGGAGCCTAACGTC      |
| NR1-F         | ATGTCACAATACCTTGATTCTCTCC |
| NR1-R         | AGTTATCCCTGTTCCACCTGC     |
| NRT1-F        | AGAGACTTGCTGAAATGGGGA     |
| NRT1-R        | GATGATGGAGTAACAAGCGCA     |
| ACT-F         | GTGCCCATTTACGAACGATA      |
| ACT-R         | GAAGACTCCATGCCGATCAT      |
